# Supplementary material
Source: publisher site journal article supplement (https://static.cambridge.org/content/id/urn:cambridge.org:id:article:S0007114519002617/resource/name/S0007114519002617supp001.docx)
Supplement: Supplementary file 1 [file S0007114519002617supp001.docx]

**Supplementary Data**

**Supplemental Table 1.** Initial and final PANDiet scores, associated subscores and probabilities of adequacy and their variations by arm (control: n=38 ; intervention: n=40)**.**

|  | **Control (n=38)** | | | | **Intervention (n=40)** | | | | *P4* |
| --- | --- | --- | --- | --- | --- | --- | --- | --- | --- |
|  | Initial1 | Final1 | Changes1, 2 | *P3* | Initial1 | Final1 | Changes1, 2 | *P3* |
| **PANDiet** | 60.44 ± 7.29 | 60.11 ± 8.66 | -0.33 ± 7.29 | 0.77 | 60.27 ± 7.28 | 63.89 ± 8.11 | 3.62 ± 9.29 | 0.018 | 0.039 |
| **Adeq-S** | 53.31 ± 17.04 | 51.61 ± 16.57 | -1.7 ± 17.04 | 0.50 | 55.57 ± 14.07 | 58.94 ± 15.91 | 3.37 ± 15.59 | 0.18 | 0.15 |
| *Protein* | 0.93 ± 0.18 | 0.89 ± 0.2 | -0.038 ± 0.18 | 0.20 | 0.93 ± 0.18 | 0.95 ± 0.13 | 0.024 ± 0.2 | 0.44 | 0.15 |
| *Total Carbohydrate* | 0.5 ± 0.39 | 0.52 ± 0.45 | 0.019 ± 0.39 | 0.82 | 0.63 ± 0.35 | 0.54 ± 0.38 | -0.087 ± 0.4 | 0.17 | 0.31 |
| *Total Fat* | 0.8 ± 0.33 | 0.76 ± 0.34 | -0.042 ± 0.33 | 0.53 | 0.82 ± 0.25 | 0.88 ± 0.2 | 0.059 ± 0.31 | 0.23 | 0.22 |
| *LA* | 0.52 ± 0.33 | 0.48 ± 0.29 | -0.035 ± 0.33 | 0.58 | 0.48 ± 0.34 | 0.58 ± 0.35 | 0.099 ± 0.45 | 0.17 | 0.16 |
| *ALA* | 0.07 ± 0.13 | 0.05 ± 0.13 | -0.016 ± 0.13 | 0.60 | 0.062 ± 0.12 | 0.19 ± 0.28 | 0.13 ± 0.25 | 0.002 | 0.005 |
| *DHA* | 0.33 ± 0.31 | 0.37 ± 0.37 | 0.044 ± 0.31 | 0.56 | 0.21 ± 0.32 | 0.3 ± 0.35 | 0.089 ± 0.41 | 0.18 | 0.65 |
| *EPA+DHA* | 0.28 ± 0.29 | 0.31 ± 0.35 | 0.03 ± 0.29 | 0.69 | 0.17 ± 0.3 | 0.24 ± 0.34 | 0.07 ± 0.41 | 0.29 | 0.68 |
| *Dietary Fiber* | 0.21 ± 0.28 | 0.18 ± 0.26 | -0.035 ± 0.28 | 0.39 | 0.22 ± 0.27 | 0.22 ± 0.23 | -0.0064 ± 0.28 | 0.89 | 0.63 |
| *Vitamin A* | 0.41 ± 0.37 | 0.41 ± 0.35 | -0.0039 ± 0.37 | 0.96 | 0.52 ± 0.33 | 0.46 ± 0.35 | -0.065 ± 0.5 | 0.41 | 0.57 |
| *Thiamin* | 0.27 ± 0.33 | 0.3 ± 0.35 | 0.033 ± 0.33 | 0.52 | 0.25 ± 0.3 | 0.37 ± 0.34 | 0.12 ± 0.32 | 0.028 | 0.25 |
| *Riboflavin* | 0.66 ± 0.36 | 0.61 ± 0.38 | -0.048 ± 0.36 | 0.46 | 0.71 ± 0.32 | 0.78 ± 0.27 | 0.069 ± 0.37 | 0.25 | 0.18 |
| *Niacin* | 0.71 ± 0.3 | 0.62 ± 0.34 | -0.094 ± 0.3 | 0.09 | 0.67 ± 0.3 | 0.7 ± 0.32 | 0.034 ± 0.37 | 0.56 | 0.11 |
| *Pantothenic acid* | 0.54 ± 0.35 | 0.58 ± 0.37 | 0.042 ± 0.35 | 0.51 | 0.61 ± 0.33 | 0.65 ± 0.33 | 0.039 ± 0.39 | 0.54 | 0.97 |
| *Vitamin B6* | 0.47 ± 0.36 | 0.41 ± 0.39 | -0.056 ± 0.36 | 0.35 | 0.49 ± 0.37 | 0.55 ± 0.36 | 0.053 ± 0.43 | 0.44 | 0.23 |
| *Folate* | 0.5 ± 0.35 | 0.5 ± 0.36 | -0.0066 ± 0.35 | 0.90 | 0.52 ± 0.31 | 0.64 ± 0.28 | 0.12 ± 0.34 | 0.029 | 0.09 |
| *Vitamin B12* | 0.84 ± 0.21 | 0.81 ± 0.29 | -0.025 ± 0.21 | 0.58 | 0.75 ± 0.32 | 0.79 ± 0.28 | 0.039 ± 0.36 | 0.50 | 0.39 |
| *Vitamin C* | 0.61 ± 0.36 | 0.66 ± 0.39 | 0.052 ± 0.36 | 0.40 | 0.59 ± 0.35 | 0.62 ± 0.38 | 0.031 ± 0.42 | 0.65 | 0.82 |
| *Vitamin D* | 0.038 ± 0.11 | 0.03 ± 0.074 | -0.0077 ± 0.11 | 0.73 | 0.05 ± 0.11 | 0.065 ± 0.2 | 0.015 ± 0.23 | 0.69 | 0.61 |
| *Vitamin E* | 0.53 ± 0.35 | 0.34 ± 0.34 | -0.18 ± 0.35 | 0.004 | 0.41 ± 0.34 | 0.47 ± 0.37 | 0.063 ± 0.42 | 0.35 | 0.008 |
| *Calcium* | 0.66 ± 0.38 | 0.71 ± 0.36 | 0.052 ± 0.38 | 0.30 | 0.79 ± 0.28 | 0.83 ± 0.22 | 0.043 ± 0.35 | 0.44 | 0.90 |
| *Iodine* | 0.34 ± 0.3 | 0.37 ± 0.35 | 0.03 ± 0.3 | 0.64 | 0.35 ± 0.31 | 0.35 ± 0.3 | -0.005 ± 0.4 | 0.94 | 0.70 |
| *Iron* | 0.74 ± 0.24 | 0.73 ± 0.23 | -0.0084 ± 0.24 | 0.83 | 0.79 ± 0.21 | 0.83 ± 0.13 | 0.037 ± 0.19 | 0.23 | 0.36 |
| *Magnesium* | 0.37 ± 0.35 | 0.37 ± 0.39 | -0.0036 ± 0.35 | 0.95 | 0.53 ± 0.36 | 0.59 ± 0.37 | 0.054 ± 0.3 | 0.26 | 0.43 |
| *Phosphorus* | 0.93 ± 0.16 | 0.92 ± 0.16 | -0.01 ± 0.16 | 0.58 | 0.98 ± 0.044 | 0.98 ± 0.087 | -0.0062 ± 0.088 | 0.66 | 0.86 |
| *Potassium* | 0.57 ± 0.33 | 0.51 ± 0.35 | -0.066 ± 0.33 | 0.18 | 0.62 ± 0.3 | 0.65 ± 0.33 | 0.026 ± 0.31 | 0.59 | 0.18 |
| *Selenium* | 0.82 ± 0.25 | 0.85 ± 0.22 | 0.03 ± 0.25 | 0.48 | 0.85 ± 0.24 | 0.83 ± 0.28 | -0.017 ± 0.27 | 0.69 | 0.43 |
| *Zinc* | 0.51 ± 0.36 | 0.45 ± 0.37 | -0.058 ± 0.36 | 0.36 | 0.63 ± 0.27 | 0.56 ± 0.31 | -0.068 ± 0.35 | 0.22 | 0.90 |
| **Mod-S** | 67.57 ± 13.74 | 68.61 ± 13.53 | 1.04 ± 13.74 | 0.69 | 64.97 ± 12.27 | 68.83 ± 11.61 | 3.86 ± 12.37 | 0.056 | 0.38 |
| *Protein* | 0.98 ± 0.085 | 0.99 ± 0.068 | 0.0082 ± 0.085 | 0.65 | 0.97 ± 0.15 | 0.98 ± 0.076 | 0.0085 ± 0.16 | 0.75 | 0.99 |
| *Total Carbohydrate* | 0.99 ± 0.026 | 0.97 ± 0.11 | -0.023 ± 0.026 | 0.19 | 0.99 ± 0.018 | 0.996 ± 0.013 | 0.0016 ± 0.023 | 0.67 | 0.16 |
| *Free Sugars* | 0.64 ± 0.35 | 0.67 ± 0.36 | 0.036 ± 0.35 | 0.63 | 0.58 ± 0.37 | 0.65 ± 0.31 | 0.07 ± 0.39 | 0.26 | 0.73 |
| *Total Fat* | 0.77 ± 0.29 | 0.78 ± 0.31 | 0.0024 ± 0.29 | 0.97 | 0.8 ± 0.29 | 0.84 ± 0.26 | 0.046 ± 0.36 | 0.43 | 0.61 |
| *Saturated Fatty Acid* | 0.33 ± 0.29 | 0.34 ± 0.33 | 0.01 ± 0.29 | 0.84 | 0.3 ± 0.27 | 0.28 ± 0.24 | -0.02 ± 0.31 | 0.69 | 0.67 |
| *Cholesterol* | 0.69 ± 0.33 | 0.68 ± 0.34 | -0.0051 ± 0.33 | 0.95 | 0.55 ± 0.32 | 0.69 ± 0.3 | 0.14 ± 0.35 | 0.013 | 0.11 |
| *Sodium* | 0.35 ± 0.38 | 0.37 ± 0.35 | 0.024 ± 0.38 | 0.71 | 0.36 ± 0.32 | 0.38 ± 0.3 | 0.022 ± 0.34 | 0.69 | 0.98 |
| *Penalty* | 0.03 ± 0.16 | 0 ± 0 | -0.026 ± 0.16 | 0.32 | 0 ± 0 | 0 ± 0 | 0 ± 0 |  |  |

1 Values are mean ± SD

2 Difference between the value obtained with the final dietary record and the initial dietary record in each group.

3 Student t-tests were performed to determine whether the mean for the deltas were different from 0 separately in each group.

4 Simple regressions were performed to determine if deltas were different between groups.
